# Supplementary material for: Polyether-grafted SnO2 nanoparticles designed for solid polymer electrolytes with long-term stabilityElectronic supplementary information (ESI) available: XPS results and in situ IR spectra. See http://www.rsc.org/suppdata/jm/b4/b405179c/
Source: Royal Society of Chemistry journal article supplement (doi:10.1039/b405179c), 2004-01-01
Supplement: b405179c.pdf [file b405179c.pdf]

## **Electronic Supplementary Information**

### **XPS Data Comparison and In Situ IR Spectra**

Huan-Ming Xiong, Da-Peng Liu, Hao Zhang, Jie-Sheng Chen\*

*State Key Laboratory of Inorganic Synthesis and Preparative Chemistry, College of Chemistry, Jilin University, Changchun 130012, People's Republic of China*

Fax: (+86)-431-5168624

E-mail: [chemcj@mail.jlu.edu.cn](mailto:chemcj@mail.jlu.edu.cn)

## Experimental

PEGME-SnO<sub>2</sub> powder was fixed on double-sided tapes to obtain the X-ray photoelectron spectra (XPS) on a VG ESCA-LAB MK II X-ray photoelectron spectrometer, using Mg-K $\alpha$  radiation under 10<sup>-7</sup> Pa. The C<sub>1s</sub> signal was used to correct the charge effects on the sample surface. On a Nicolet Impact 410 FTIR spectrometer, the in situ IR spectra of the PEGME-SnO<sub>2</sub> doped PEO-LiClO<sub>4</sub> films were measured in vacuum through a cell with CaF<sub>2</sub> windows.

## Results and Discussion

Figure S1 lists the XPS results of the freshly prepared SnO<sub>2</sub> nanoparticles and PEGME-SnO<sub>2</sub> nanocomposites. The freshly precipitated SnO<sub>2</sub> nanoparticles adsorb a lot of Cl<sup>-</sup> anions on their surfaces, about 13.6 % atom percent according to peak area integration. The data for PEGME-SnO<sub>2</sub> nanocomposites are different: no Cl element signals are detected and Sn atom signals are much weaker than that of SnO<sub>2</sub> due to PEGME group shielding effects (exhibiting strong C<sub>1s</sub> signals). Therefore, it can be inferred that PEGME groups have replaced the Cl<sup>-</sup> anions adsorbed on SnO<sub>2</sub> surface after exchange reactions.

Figure S2 displays the in situ IR spectra of the PEGME-SnO<sub>2</sub> doped PEO-LiClO<sub>4</sub> film, indicating that no water or solvents exist in the composite SPE films after evacuation. Although a trace amount of solvents or water can greatly enhance the film conductivities, these impurities will corrode lithium electrodes and cause safety problems as far as the application in lithium batteries is concerned.

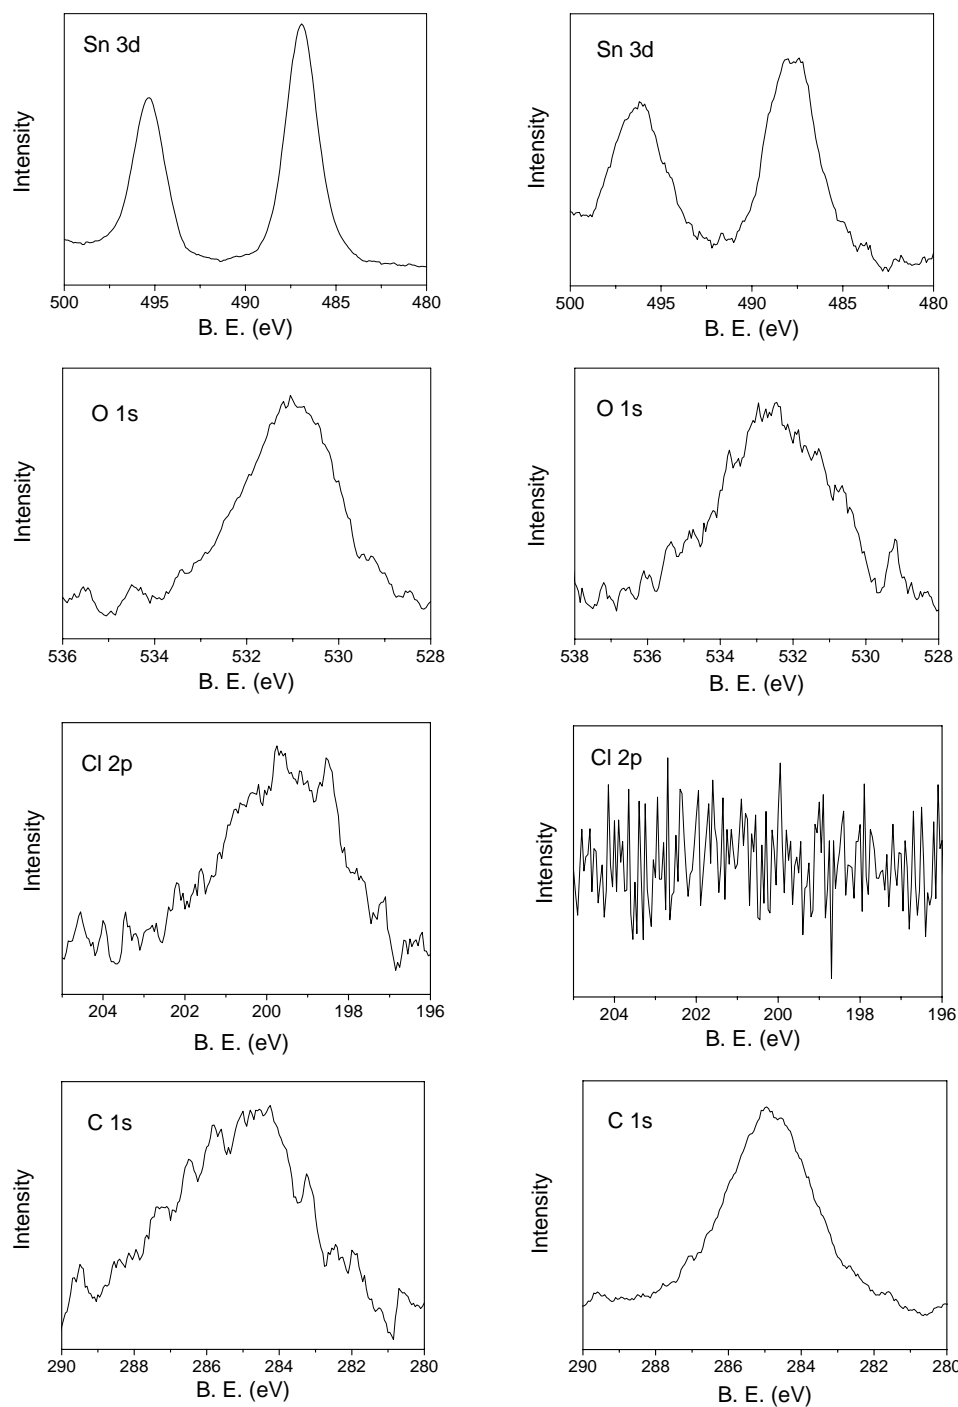

**Figure S1.** XPS results of the freshly prepared SnO<sub>2</sub> nanoparticles (left) and the PEGME-SnO<sub>2</sub> nanocomposites (right). It should be noted that since the deposited carbon from pump oil is used as the internal reference, both samples shows C<sub>1s</sub> signals.

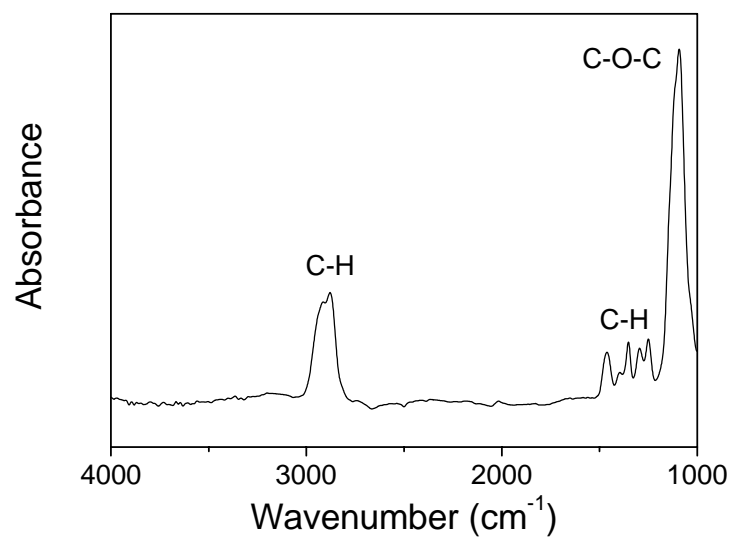

**Figure S2.** In situ IR spectra of the PEGME-SnO<sub>2</sub> (10 wt. %) doped PEO-LiClO<sub>4</sub> ([EO]/[Li] = 10) film, evident for absence of water and solvents.
